# Supplementary material
Source: ML conference proceedings conference paper supplement (https://openaccess.thecvf.com/content/CVPR2021/html/Zhang_CoLA_Weakly-Supervised_Temporal_CVPR_2021_paper.html)
Supplement: Supplementary file 2 [file Zhang_CoLA_Weakly-Supervised_Temporal_CVPR_2021_supplemental.zip]

Archive with 3 entries (3 files):
- [VIS]-Mr_Bean_Diving.mp4
- [VIS]-THUMOS14_Billiards.mp4
- CoLA_Supplementary_Material.pdf
